# Supplementary material
Source: PubMed Central journal article supplement (PMC7273505)
Supplement: NIHMS1591490-supplement-1.pdf [file NIHMS1591490-supplement-1.pdf]

**Cell Reports, Volume 31**

**Supplemental Information**

**Succinate Can Shuttle Reducing Power  
from the Hypoxic Retina  
to the O<sub>2</sub>-Rich Pigment Epithelium**

**Celia M. Bisbach, Daniel T. Hass, Brian M. Robbins, Austin M. Rountree, Martin Sadilek, Ian R. Sweet, and James B. Hurley**

**Figure S1**

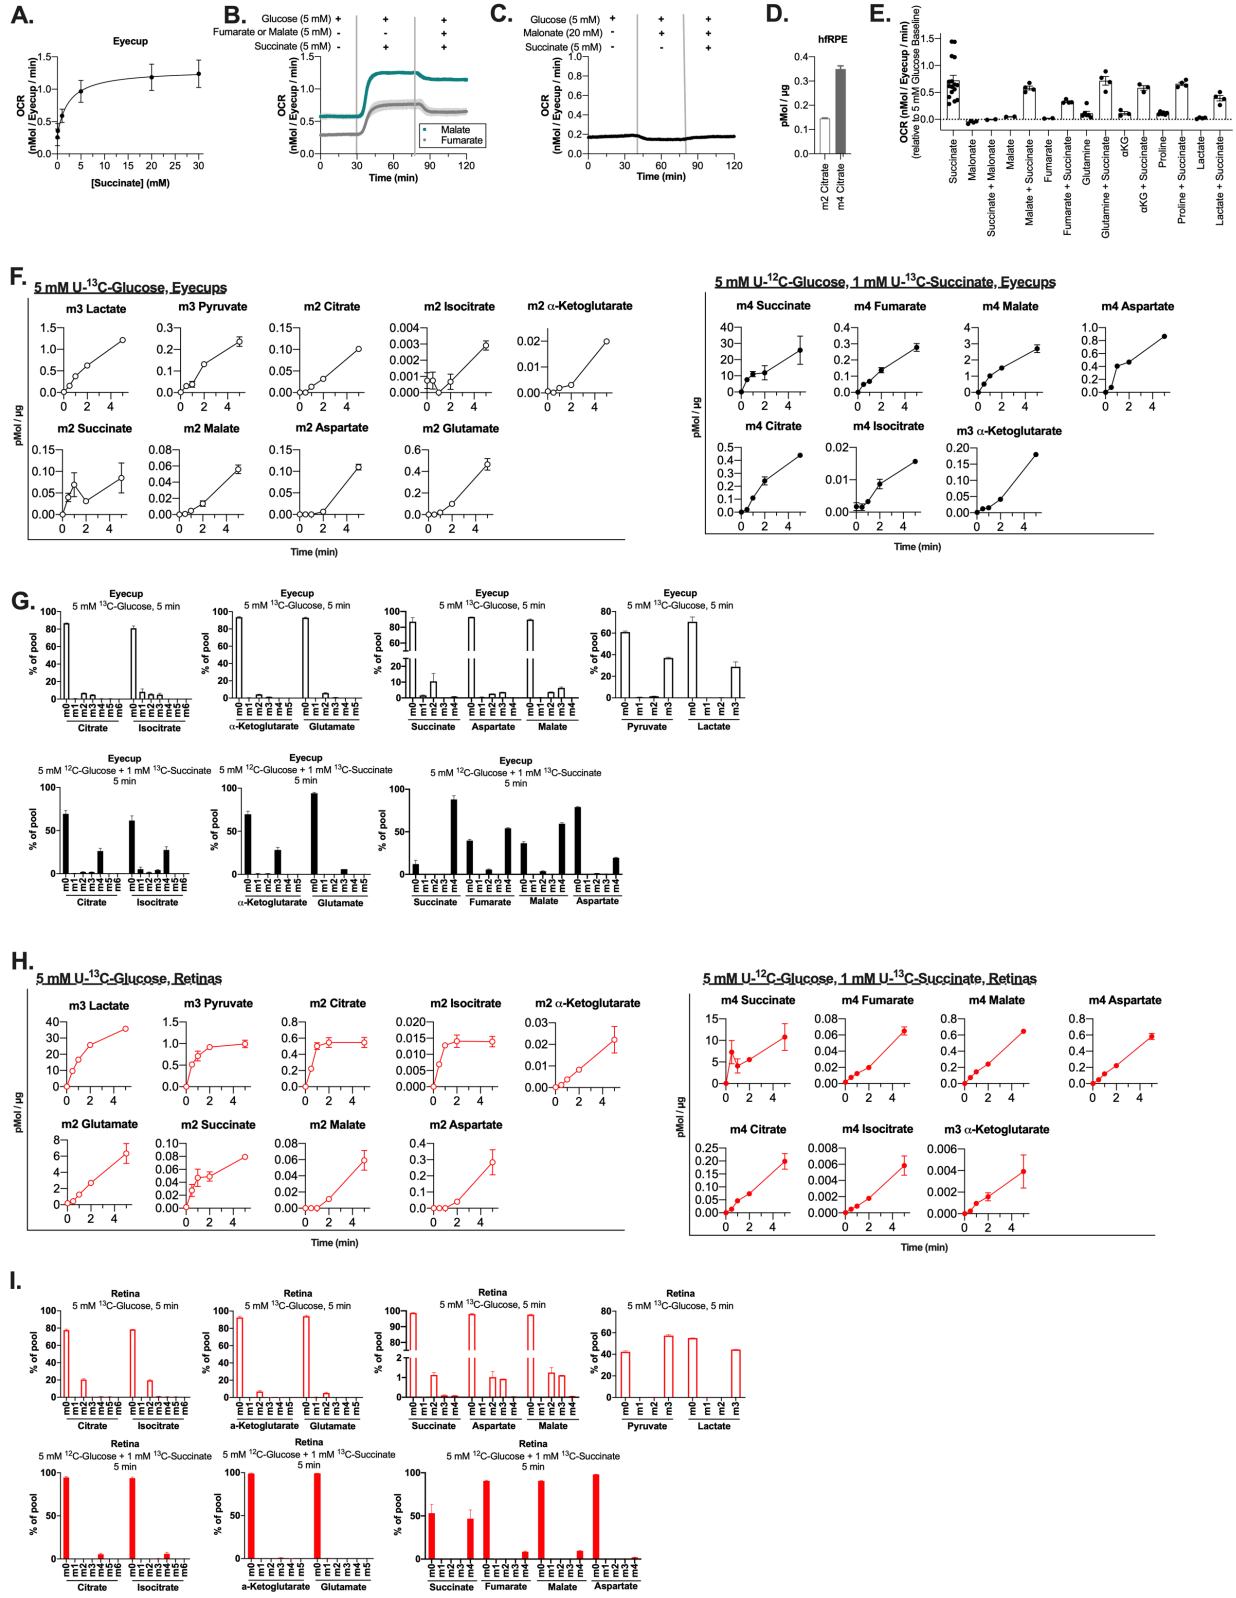

**Figure S1: Additional oxygen consumption experiments and raw traces (related to Figure 1)**

- A. Oxygen consumption of eyecup tissue perfused with 0, 0.1, 1, 5, 20, and 30 mM succinate in the presence of 5 mM glucose (n=3 chambers, error bars indicate SEM).
- B. Oxygen consumption of eyecups perfused with media containing 5 mM glucose, then 5 mM glucose + 5 mM fumarate (gray) or malate (teal), then 5 mM glucose + 5 mM fumarate or malate + 5 mM succinate (n=2 chambers, error bars indicate SEM).
- C. Raw trace of eyecups supplied with 5 mM glucose, then 5 mM glucose + 20 mM malonate, then 5 mM glucose + 20 mM malonate + 5 mM succinate. (n=2 chambers, error bars indicate SEM)
- D. Citrate production in human fetal RPE (hfRPE) supplied with either 5 mM U-<sup>13</sup>C-glucose alone (m2 Citrate) or 5 mM <sup>12</sup>C-glucose + 1 mM U-<sup>13</sup>C-succinate (m4 Citrate) for 2 minutes (n=2 plates of cells, error bars indicate SEM).
- E. Compiled change in OCR for eyecups supplied with various metabolites (relative to 5 mM glucose condition alone). All metabolites were supplied at 5 mM, with the exception of malonate which was supplied at 20 mM. All metabolites were supplied in the presence of 5 mM glucose. Succinate, malonate, and succinate + malonate conditions are duplicated from figure 1D for ease of comparison (each dot represents measurements taken from a single chamber, error bars indicate SEM).
- F. Accumulation of labeled TCA cycle metabolites in eyecups supplied with 5 mM <sup>12</sup>C-glucose alone (left panel) or 5 mM <sup>12</sup>C-glucose + 1 mM U-<sup>13</sup>C-succinate (right panel) (n=2 eyecups per time point, error bars indicate SEM).
- G. Full isotopic distribution of metabolites in eyecups at the 5 minute time point from the experiments described in (F) (n=2 eyecups per time point, error bars indicate SEM).
- H. Accumulation of labeled TCA cycle metabolites in retinas supplied with 5 mM <sup>12</sup>C-glucose alone (left panel) or 5 mM <sup>12</sup>C-glucose + 1 mM U-<sup>13</sup>C-succinate (right panel). Of note, equilibration of  $\alpha$ -ketoglutarate with the large, unlabeled glutamate pool in retinas makes causes the specific activity of the <sup>13</sup>C tracer to drop for metabolites after and including  $\alpha$ -ketoglutarate in retinas supplied with U-<sup>13</sup>C-glucose (Du et al., 2013) (n=2 retinas per time point, error bars indicate SEM).
- I. Full isotopic distribution of metabolites in retinas at the 5 minute time point from the experiments described in (H) (n=2 retinas per time point, error bars indicate SEM).

Figure S2

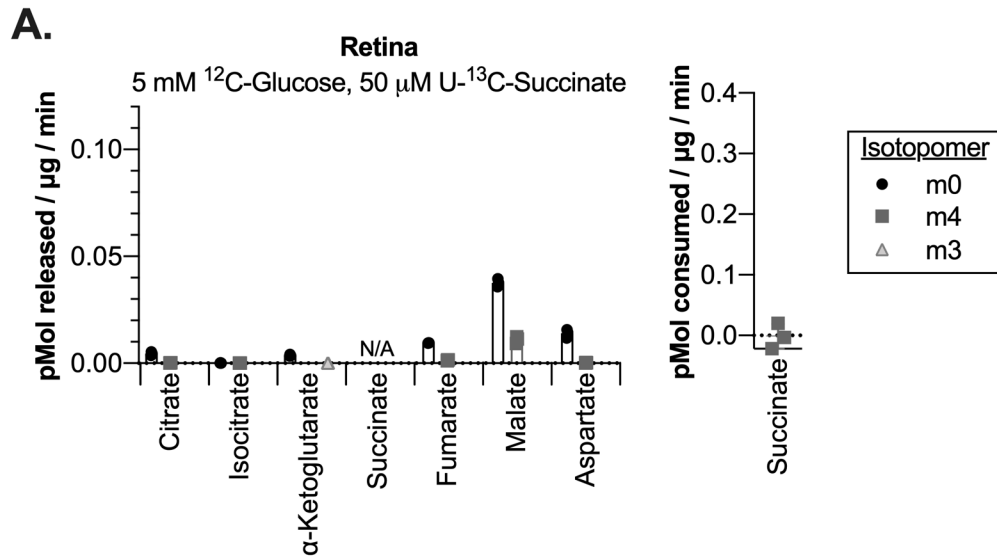

**Figure S2: Metabolites exported by retinas supplemented with succinate (related to Figure 2)**

A. Rate of TCA cycle metabolite release by retinas incubated in 5 mM  $^{12}\text{C}$ -glucose + 50  $\mu\text{M}$   $\text{U-}^{13}\text{C}$ -succinate for 30 minutes. The rate of succinate consumption by retinas during incubation is shown on the right panel (n=3 retinas, error bars indicate SEM).

**Figure S3**

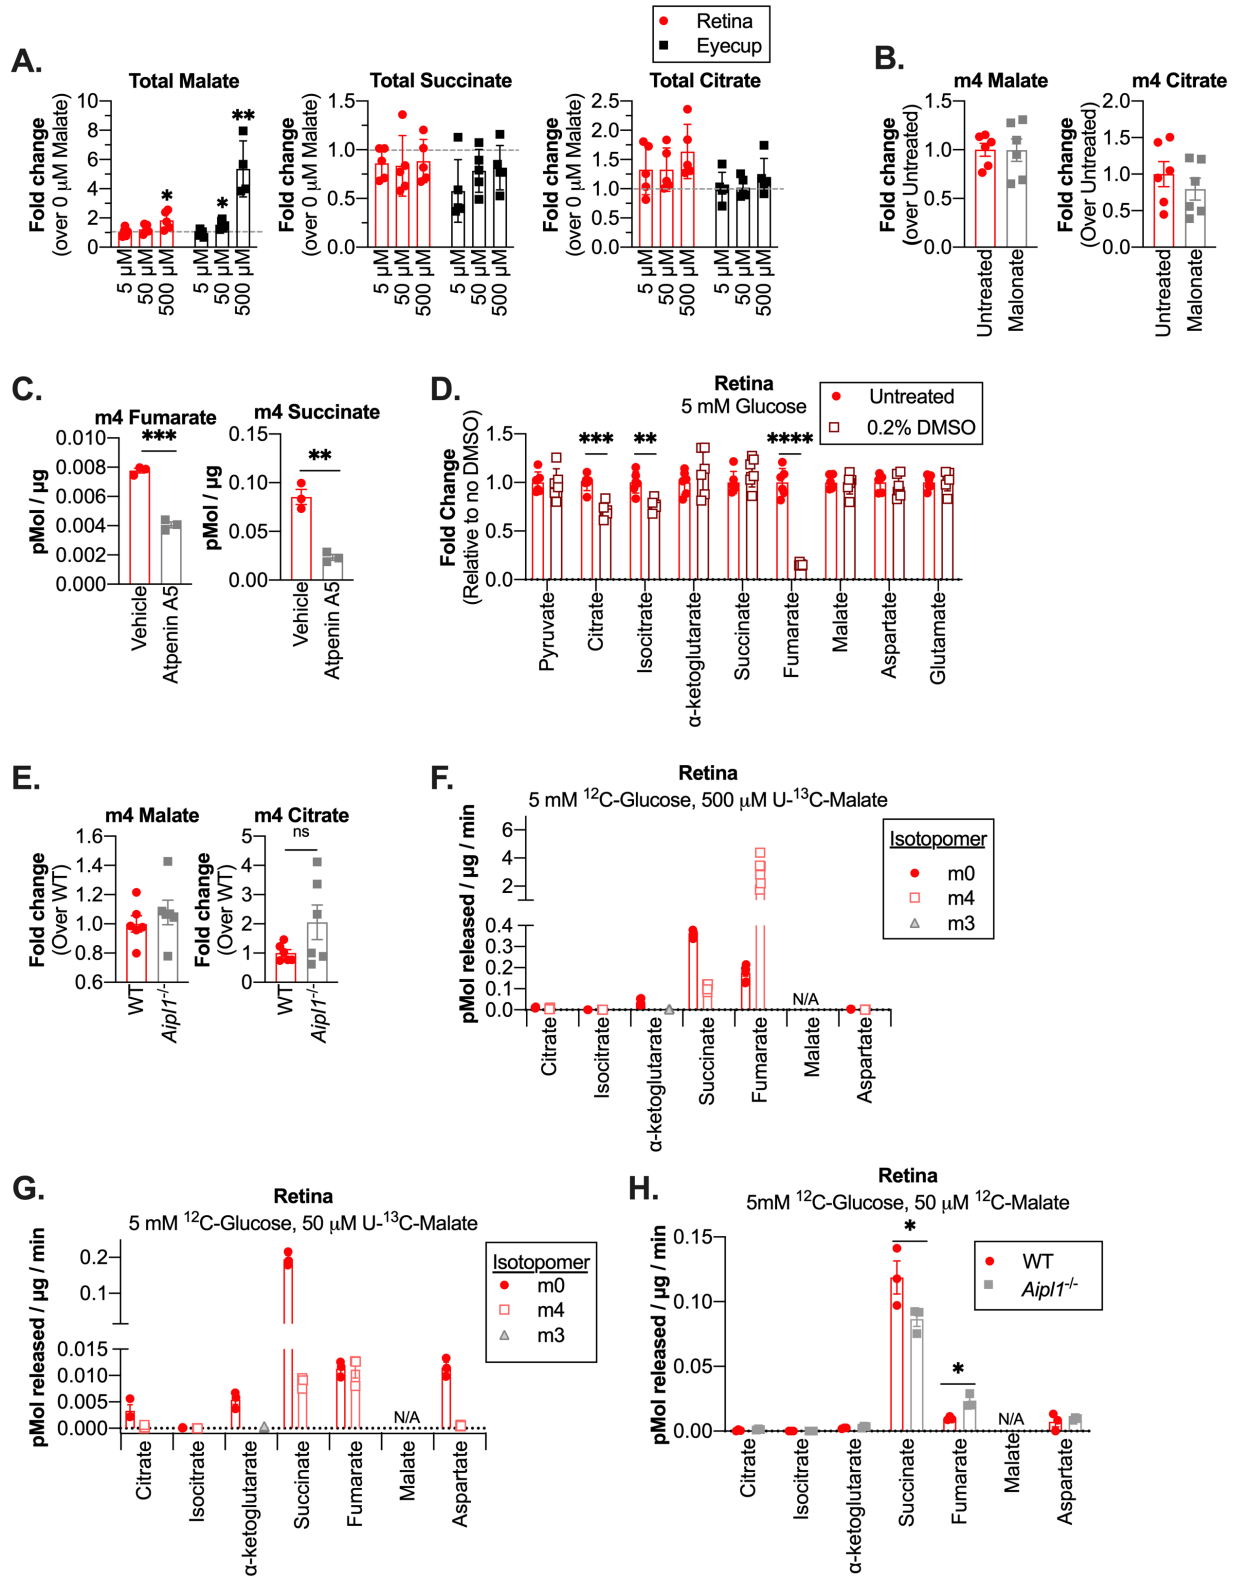

**Figure S3: Additional validation of tracers used to observe reverse SDH activity in retinas (related to Figure 3)**

- A. Total malate, succinate, and citrate levels in retinas and eyecups incubated in 5 mM  $^{12}\text{C}$ -glucose and 5, 50, or 500  $\mu\text{M}$  U- $^{13}\text{C}$ -malate for 5 minutes (n=5 retinas or eyecups per concentration, error bars indicate SEM).
- B. m4 malate and m4 citrate levels in retinas incubated in 5 mM  $^{12}\text{C}$ -glucose + 50  $\mu\text{M}$  U- $^{13}\text{C}$ -malate in the presence or absence of malonate for 5 minutes (relative to untreated) (n=6 retinas, error bars indicate SEM).
- C. m4 fumarate and m4 succinate levels in retinas incubated in 5 mM  $^{12}\text{C}$ -glucose + 50  $\mu\text{M}$  U- $^{13}\text{C}$ -malate and either 2  $\mu\text{M}$  Atpenin A5 or vehicle (0.2% DMSO) for 5 minutes (n=3 retinas, error bars indicate SEM).
- D. Total metabolite levels in retinas incubated in 5 mM  $^{12}\text{C}$ -glucose in the presence or absence of 0.2% DMSO for 5 minutes (n=6 retinas, error bars indicate SEM).
- E. m4 malate and m4 citrate produced by WT and *Aipl1*<sup>-/-</sup> retinas supplied with 5 mM  $^{12}\text{C}$ -glucose + 50  $\mu\text{M}$  U- $^{13}\text{C}$ -malate for 5 minutes (n=6 retinas, error bars indicate SEM).
- F. Rate of TCA cycle metabolite release by retinas incubated in 5 mM  $^{12}\text{C}$ -glucose + 500  $\mu\text{M}$  U- $^{13}\text{C}$ -malate for 60 and 90 minutes (n=6 retinas, 3 per time point, error bars indicate SEM).
- G. Rate of TCA cycle metabolite release by retinas incubated in 5 mM  $^{12}\text{C}$ -glucose + 50  $\mu\text{M}$  U- $^{13}\text{C}$ -malate for 30 minutes (n=3 retinas, error bars indicate SEM).
- H. Rate of TCA cycle metabolite release by WT and *Aipl1*<sup>-/-</sup> retinas incubated in 5 mM  $^{12}\text{C}$ -glucose + 50  $\mu\text{M}$   $^{12}\text{C}$ -malate for 30 minutes (n=3 retinas, error bars indicate SEM).

**Figure S4**

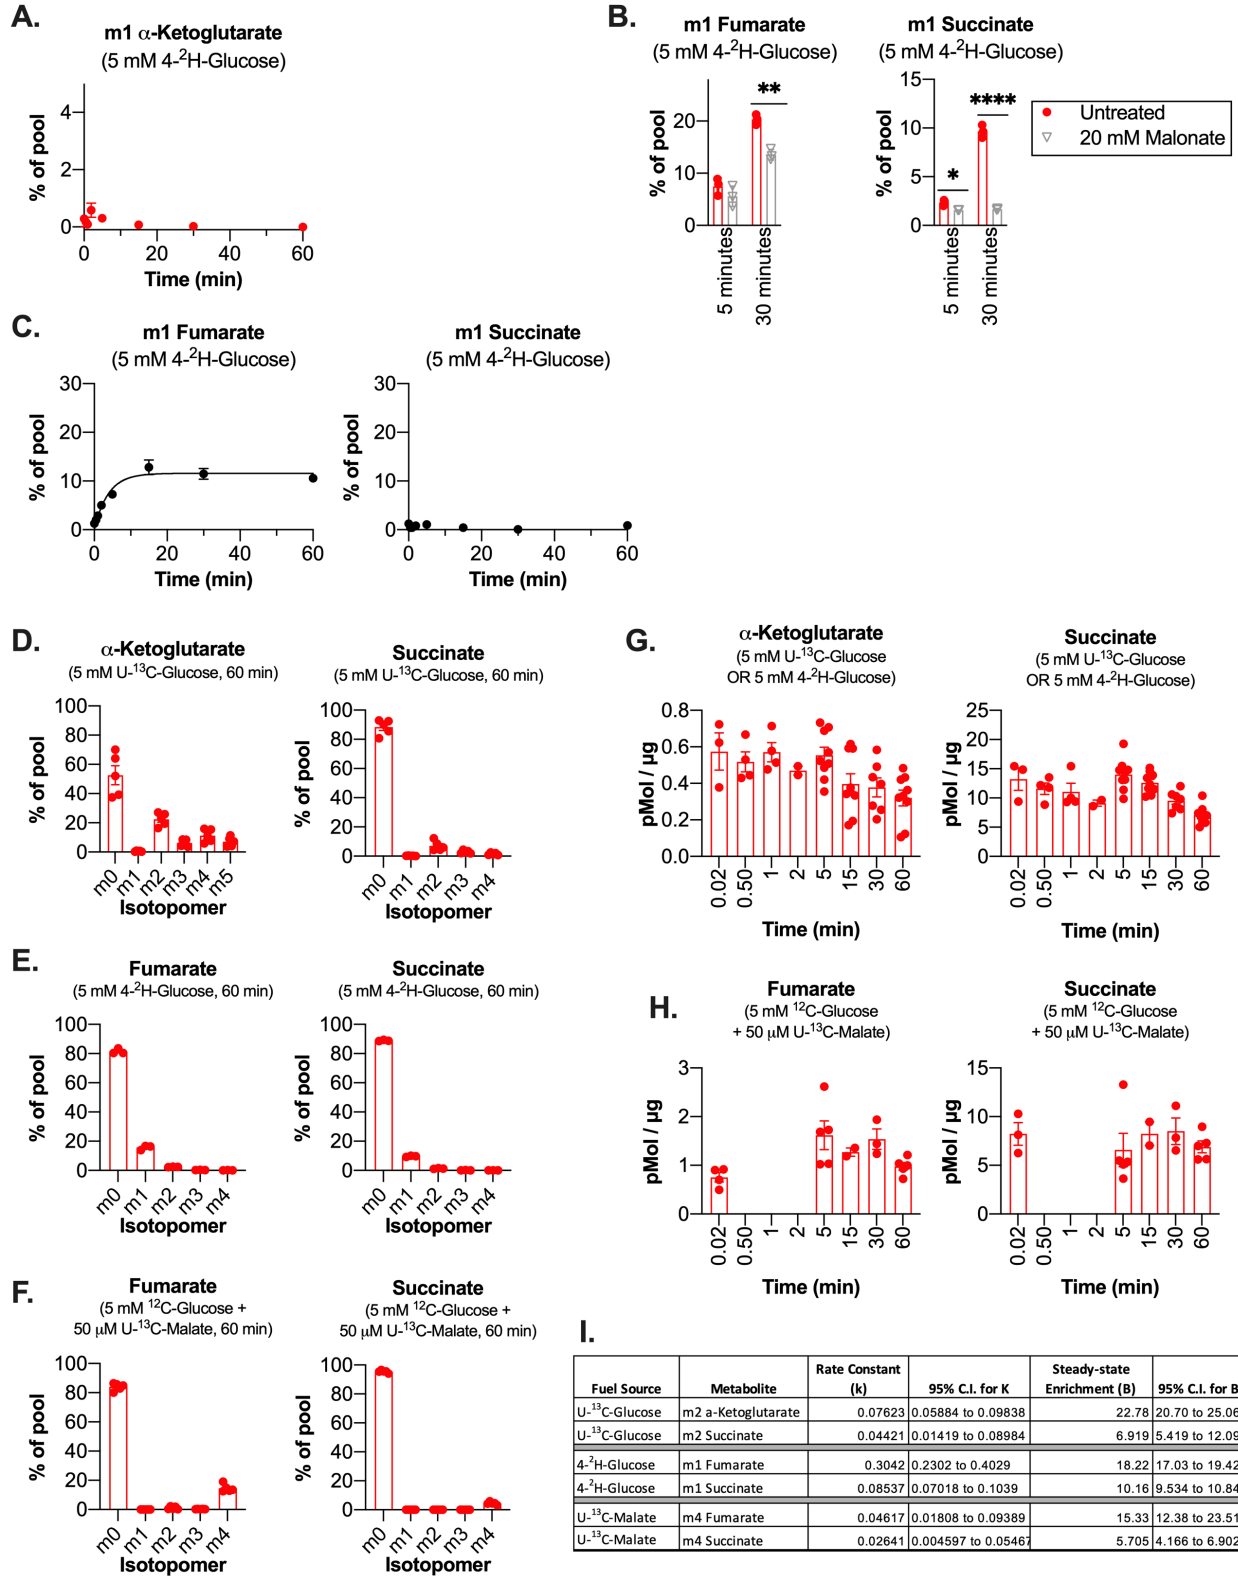

**Figure S4: Additional controls and isotopomers from extended  $^{13}\text{C}$ -glucose, 4- $^2\text{H}$ -glucose, and  $^{13}\text{C}$ -malate time courses (related to Figure 4)**

- A. m1  $\alpha$ -ketoglutarate signal from retinas supplied with 5 mM 4- $^2\text{H}$ -glucose for 0.02, 0.5, 1, 2, 5, 15, 30, and 60 minutes (n=3 retinas per time point, error bars indicate SEM).
- B. % enrichment of m1 fumarate and m1 succinate in retinas incubated in 5 mM 4- $^2\text{H}$ -glucose for 5 and 30 minutes, in the presence or absence of 20 mM malonate (n=3 retinas per time point, error bars indicate SEM).
- C. % enrichment of m1 fumarate and m1 succinate in eyecups incubated in 5 mM 4- $^2\text{H}$ -glucose for 0.02, 0.5, 1, 2, 5, 15, 30, and 60 minutes (n=3 eyecups per time point, error bars indicate SEM)
- D. Fractional enrichment for all isotopomers of  $\alpha$ -ketoglutarate and succinate in retinas supplied with 5 mM U- $^{13}\text{C}$ -glucose for 60 minutes (n=5 retinas, error bars indicate SEM).
- E. Fractional enrichment for all isotopomers of fumarate and succinate in retinas supplied with 5 mM 4- $^2\text{H}$ -glucose for 60 minutes (n=3 retinas, error bars indicate SEM).
- F. Fractional enrichment for all isotopomers of fumarate and succinate in retinas supplied with 5 mM  $^{12}\text{C}$ -glucose + 50  $\mu\text{M}$  U- $^{13}\text{C}$ -malate for 60 minutes (n=5 retinas, error bars indicate SEM).
- G. Total succinate and  $\alpha$ -ketoglutarate levels in retinas supplied with 5 mM glucose for 0.02, 0.5, 1, 2, 5, 15, 30, and 60 minutes (n=3 to 9 retinas per time point, error bars indicate SEM).
- H. Total fumarate and succinate levels in retinas supplied with 5 mM glucose + 50  $\mu\text{M}$  malate for 0.02, 0.5, 1, 2, 5, 15, 30, and 60 minutes (n=3 to 5 retinas per timepoint, error bars indicate SEM).
- I. Table of constants and confidence intervals calculated by Graphpad Prism using the equation  $\%metabolite = B * (1 - e^{-kt})$  to fit each curve. B is the fractional enrichment at the steady state, k is the rate constant for the reaction, t is time, and %metabolite is the fractional enrichment at a given time.



Figure S5

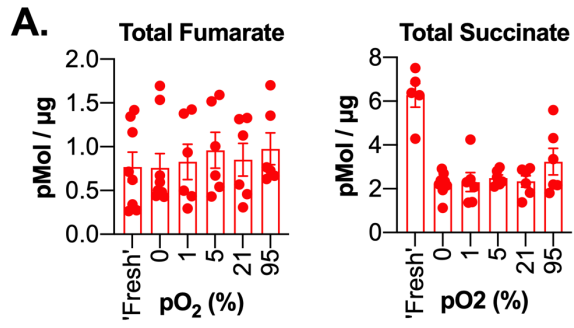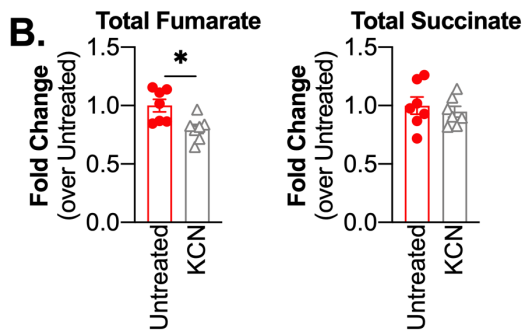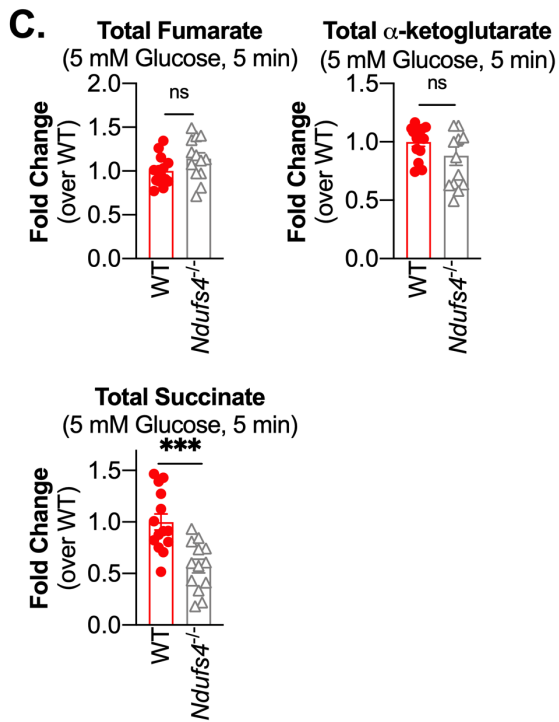

**Figure S5: Total metabolite levels from incubations at varied pO<sub>2</sub> and *Ndufs4*<sup>-/-</sup> retinas (related to Figure 5)**

- A. Total fumarate and succinate levels in retinas incubated in 5 mM <sup>12</sup>C-glucose + 50 μM U-<sup>13</sup>C-malate for 5 minutes. “Fresh” indicates that retinas were incubated immediately after dissection. “pO<sub>2</sub>” indicates that retinas were incubated at the specified level of oxygen for 2 hours (in 5 mM <sup>12</sup>C-glucose) prior to incubation in labeled malate (n=6 to 9 retinas per pO<sub>2</sub> condition, error bars indicate SEM).
- B. Total fumarate and succinate levels in retinas supplied with 5 mM <sup>12</sup>C-glucose + 50 μM U-<sup>13</sup>C-malate in the presence of 3 mM KCN (n=6 retinas, error bars indicate SEM).
- C. Total fumarate, succinate, and α-ketoglutarate levels in WT and *Ndufs4*<sup>-/-</sup> retinas supplied with 5 mM glucose for 5 min (n=14 WT and 13 *Ndufs4*<sup>-/-</sup> retinas, error bars indicate SEM).
